# Supplementary material for: Polygenic Basis and Variable Genetic Architectures Contribute to the Complex Nature of Body Weight —A Genome-Wide Study in Four Chinese Indigenous Chicken Breeds
Source: Front Genet. 2018 Jul 2;9:229. doi: 10.3389/fgene.2018.00229 (PMC6036123; doi:10.3389/fgene.2018.00229)
Supplement: DATA SHEET S3 — The phenotype datasets of this study. [file Data_Sheet_3.XLSX]

## Sheet: Chahua
individual id	sex	blood sample id	BW0	BW1	BW2	BW3	BW4	BW5	BW6	BW7	BW8	BW9	BW10	BW11	BW12	BW13	BW14	BW15
G00101	M	CH73	21.2	51.4	81.4	143.9	208.8	253.2	338	384	430	473	490	551	650	704	771	746
G00102	F	CH28	21.4	45.4	72	118.7	165.2	220.6	286	365	424	493	542	602	674	712	772	785
G00104	M	CH85	23.2	51	61.4	133.7	191.6	247.1	322	406	470	568	671	722	862	914	940	987
G00105	F	CH18	21.4	42.8	61.7	63.4	129.4	173.6	238	296	346	382	482	545	612	684	736	760
G00107	F	CH30	22.6	44.4	70.3	97.8	130	173.1	234	291	313	385	439	489	580	640	626	735
G00109	M	CH53	22.4	43.4	60.5	92.7	125.2	182.2	251	337	367	480	546	620	716	792	873	881
G00111	F	CH37	21.4	46.4	71.3	102.1	149.8	185.4	264	341	375	441	525	609	680	716	777	809
G00112	M	CH86	20.6	50.2	79.9	133.7	203.6	280.6	369	489	554	643	756	843	936	998	1035	1100
G00113	M	CH93	20.8	42.2	69	121.7	185.2	236.6	324	416	460	543	659	687	812	810	892	876
G00114	M	CH102	21.6	43.4	64.2	120.2	172.4	238.9	291	379	452	526	596	670	778	820	900	912
G00115	M	CH55	20	54.2	88.2	146.7	210.4	280.3	360	463	536	603	711	781	870	944	1022	1060
G00116	F	CH44	24.6	48.2	73.1	100.4	143.2	204.4	273	328	391	465	536	576	666	702	768	790
G00117	F	CH49	21.6	43.6	87.1	105.6	142.2	191	249	309	356	418	492	553	622	660	717	702
G00118	M	CH58	22.6	54	85.3	142.2	189	253.4	320	402	461	363	554	660	738	774	833	850
G00120	F	CH5	23.2	46.6	71.3	102.3	139	191	258	333	376	460	506	563	604	640	694	718
G00121	F	CH4	19	35.6	60.8	88.6	119.8	160.3	182	245	287	339	378	420	470	508	557	572
G00122	M	CH90	23	47.2	70.9	112.7	171.4	237.8	323	438	519	664	766	917	1012	1072	1128	1152
G00123	M	CH54	20.4	44.2	67.9	105.1	168.8	173.3	309	282	322	376	425	463	524	538	616	646
G00124	F	CH45	21.6	45.6	74.1	117.1	123.8	210.6	283	344	308	403	472	523	600	654	720	735
G00125	M	CH98	20.4	45	71.7	109.2	139	196.3	256	322	348	415	487	560	586	614	652	672
G00126	F	CH31	22.8	46.4	69	100	144.8	177.7	240	302	335	397	467	513	562	592	619	642
G00127	F	CH16	22.8	44.2	74	117.7	179.2	243.3	312	384	450	530	629	711	794	878	904	950
G00128	F	CH42	22.6	47	69.5	118.5	155	200.5	261	336	358	442	508	587	650	690	758	785
G00130	F	CH41	21.2	53.8	85.1	136.5	204.6	256.9	341	377	429	526	620	731	836	888	961	1034
G00131	M	CH97	22	45.8	80.1	130.1	199.6	257.7	352	445	538	624	739	840	960	1000	1079	1121
G00132	F	CH12	25.2	50.4	83.4	132.9	186	239.7	222	372	436	497	569	441	694	729	777	792
G00133	M	CH71	23	50.2	80	112.4	162.8	223.3	277	345	388	497	518	598	670	734	812	811
G00134	M	CH81	20.4	40.8	66.1	110.6	151.6	211.5	278	364	448	533	634	486	786	836	852	897
G00135	F	CH36	24.2	48	80.3	113.9	145.8	199.8	263	325	367	419	479	550	602	636	681	696
G00137	F	CH34	18.6	42.8	65.1	102	147.6	190.1	238	296	348	400	482	530	562	600	637	662
G00139	F	CH40	23.6	47.2	71.4	118.7	154.6	212.5	251	316	359	433	490	546	608	644	677	713
G00140	F	CH19	23	46	76.1	116.9	167	223	278	342	383	508	505	563	634	680	732	781
G00141	M	CH68	21.2	48.2	75.3	123.7	193.6	252.9	349	454	524	657	770	863	984	976	1056	1100
G00142	M	CH61	21.2	45.8	72.1	106.8	155.6	214.9	278	379	389	443	509	560	626	680	737	757
G00143	M	CH79	21.8	49.4	82.6	112.7	179.2	234.8	296	380	448	527	617	666	742	810	827	886
G00144	M	CH57	18.6	40	60.2	96.4	141	193.4	245	322	364	432	497	544	622	678	722	736
G00145	M	CH70	21.4	48.6	81.6	120.1	170.4	216.5	322	409	473	589	688	771	860	938	1008	1040
G00146	M	CH63	21.8	47.2	70.4	113.8	171.4	219.7	296	368	410	410	534	614	710	762	841	864
G00148	F	CH35	22.4	49	77.2	125.7	177.6	215.1	274	344	372	451	508	573	642	708	735	758
G00149	M	CH80	20.8	48	76.7	115.5	169.6	206.2	271	344	384	472	537	602	680	704	732	782
G00150	M	CH60	22.4	43.4	71.3	114.1	151	205.3	272	331	372	462	528	604	690	736	823	850
G00151	F	CH50	23.4	52.8	78.4	119.3	153	205.3	276	327	381	444	502	580	600	696	742	740
G00154	F	CH25	20.6	42.6	61.8	91.3	123.8	173	208	265	303	378	443	503	558	600	639	689
G00156	F	CH7	20.8	39.6	64	98.1	139.6	174.5	246	315	359	435	522	595	668	730	816	844
G00158	F	CH39	21.4	56.8	94.6	172	197.6	263.5	340	406	444	531	620	690	762	860	880	905
G00159	F	CH48	24.2	47.8	75.7	114	150.2	193	239	295	328	389	448	483	526	556	605	623
G00161	F	CH47	21	43.8	65	94.4	130.2	177.1	235	294	327	380	435	479	526	552	598	625
G00162	F	CH46	21.2	49.2	74.5	116.8	160.2	219.1	285	355	373	430	508	535	606	676	720	727
G00164	M	CH64	21.2	46.8	73.6	115.9	152.8	190.3	267	369	342	428	496	515	620	702	710	762
G00166	F	CH29	20.2	45.4	65.2	98.6	127.4	159.8	202	265	329	373	454	505	484	602	653	799
G00167	F	CH27	22.2	50	81.1	124.1	179.4	232.5	300	365	432	509	593	671	752	790	863	1894
G00168	F	CH14	22.6	44.2	68.8	97.1	138.6	197.1	271	329	296	386	424	532	592	632	681	723
G00169	F	CH2	23	43.8	61.3	90.7	126.6	175	232	291	350	409	492	568	630	702	747	718
G00170	F	CH38	24.4	44	58.4	95.6	127.8	182.9	236	288	321	390	440	495	544	588	636	650
G00172	F	CH43	20.2	49	74.5	107.5	153.4	206.9	268	342	374	445	531	609	704	730	805	823
G00173	M	CH56	23.2	46.2	67.6	108.6	164.4	219.6	286	345	380	447	522	557	620	642	692	715
G00174	F	CH24	23.4	4.8	73.8	114.4	159.6	180.6	239	305	300	359	427	467	554	544	585	637
G00175	F	CH8	NA	NA	NA	NA	NA	NA	NA	NA	NA	NA	NA	NA	NA	NA	NA	NA
G00176	M	CH91	17.6	39.6	68.6	100.8	139	182.7	239	320	353	417	468	564	640	698	763	762
G00177	M	CH92	21	49.6	85.2	145.8	162.4	265.5	369	443	487	596	702	765	864	868	968	968
G00178	F	CH52	20.8	40.2	64.5	102.7	170.2	182.4	226	286	329	390	433	684	524	586	636	648
G00179	M	CH100	23.8	51.2	78.1	119.5	176.6	239.1	328	411	438	580	640	726	782	846	716	820
G00180	F	CH22	21.4	40	76.3	99.3	136	190	251	324	376	447	506	570	660	712	774	797
G00181	F	CH33	22.2	47.6	68.5	107.9	139.4	187.5	239	309	339	409	466	516	590	620	658	673
G00182	F	CH13	23.4	52.4	86	124.1	155.8	228.2	287	352	405	506	587	664	728	792	834	884
G00183	M	CH74	21	48.8	79.3	129.8	182.2	225.4	309	391	401	525	624	719	848	920	989	1011
G00184	M	CH65	22.4	45	76.8	118.9	169.2	210.1	282	374	446	533	619	682	746	794	846	915
G00185	M	CH99	22.2	51.6	78.2	122.4	169	222.6	293	308	388	465	555	634	734	770	858	884
G00186	F	CH32	21.2	53	80.3	132.5	183.4	238.9	316	397	473	539	627	686	770	832	865	889
G00187	M	CH69	23.2	53	82.6	141.7	204.2	288.9	350	446	499	632	715	790	886	942	1034	1047
G00188	F	CH26	21.2	47.8	78.8	102.3	145.4	196.9	247	300	333	371	460	514	566	576	660	659
G00189	M	CH88	23.8	54.6	89.2	136.4	200	257.2	351	442	503	595	701	800	888	948	1016	1032
G00191	F	CH15	21	39.6	57.6	82.9	108.4	150.4	210	281	324	395	469	482	586	650	723	727
G00192	F	CH3	21.6	49.2	81	119.8	171.2	208.2	289	351	404	487	515	600	682	742	820	860
G00193	M	CH83	20.4	36.6	52.3	74.5	104.5	126.2	169	229	297	360	436	484	526	608	654	685
G00194	F	CH6	22.6	45.6	71.3	111.8	147.6	185.4	258	310	358	402	461	494	582	614	651	670
G00195	F	CH23	20.8	44.8	69	103.5	146.8	189.7	236	300	361	415	491	556	622	660	719	731
G00196	M	CH95	21.8	51.4	88.5	133.6	178.8	260.4	342	438	509	615	692	788	860	930	984	1016
G00197	M	CH78	22.4	46	68.7	107.1	152	201.9	294	354	396	481	602	697	796	870	875	967
G00198	M	CH76	24.8	49.6	82.4	137.1	197.6	269.9	365	480	527	630	726	830	942	1014	1078	1096
G00201	F	CH17	20.8	33.8	55.4	88.3	125.6	157	215	254	286	346	393	427	486	530	529	555
G00202	F	CH1	19.4	44.6	63.8	98.8	131	178.6	237	310	351	409	470	514	566	636	682	702
G00204	M	CH62	22.2	44	62.8	89.4	116.4	157.3	215	271	330	398	461	513	588	642	669	740
G00205	M	CH101	21.6	51	86.4	143	197.2	275.1	278	439	507	619	719	798	888	924	984	1012
G00206	M	CH87	20.6	49.2	77.5	118.3	153.6	223.6	288	374	395	512	546	634	666	724	779	797
G00207	F	CH10	NA	NA	NA	NA	NA	NA	NA	NA	NA	NA	NA	NA	NA	NA	NA	NA
G00208	F	CH51	23.6	57.2	92	131.5	184.8	268.1	351	423	487	553	652	717	750	834	946	744
G00210	F	CH9	23	45.8	73.1	110.9	159.4	211.7	253	302	326	413	446	521	592	640	664	726
G00211	F	CH20	23.4	48.6	73.1	99.4	135.8	185.7	239	290	326	386	446	495	514	552	610	622
G00212	M	CH77	18.8	42.8	68.4	107.6	141.4	187.6	234	337	372	440	528	576	658	709	759	803
G00213	F	CH11	23.6	44.6	69.4	98.2	130.2	174.9	355	263	282	337	383	443	490	534	558	565
G00214	M	CH75	23	50.8	78.3	138.6	167	238.2	303	376	425	503	595	658	766	808	874	902
G00216	F	CH21	19.4	43	65.8	110.7	159.8	198.7	264	330	394	451	529	591	634	696	743	754
G00218	M	CH96	22.2	43	65.9	100.4	140	171.1	226	293	322	364	455	522	564	644	614	563
G00221	M	CH67	21	43.2	81.8	117.9	173.4	233.5	299	391	462	537	600	691	736	770	838	858
G00223	M	CH72	20.2	49.6	72.9	116.9	170	215	284	369	438	506	612	719	764	870	909	966
G00224	M	CH89	23.4	51	83	120.1	174.6	227.3	293	374	450	550	633	724	824	906	920	966
G00226	M	CH59	22	42.4	63.9	104.5	146.6	221.3	309	379	479	569	664	790	884	926	995	1018
G00229	M	CH82	25	48	77.6	134.9	169.4	228.5	294	383	468	556	655	730	830	892	970	1018
G00231	M	CH66	22	47.6	83.2	128.5	187	258.6	331	405	493	570	651	723	798	848	920	930
G00299	M	CH94	21	46	83.1	135.9	159.6	206.9	275	376	405	458	554	639	734	806	858	852
G00300	M	CH84	18.6	43.2	70.3	120.1	177.2	240.5	305	406	496	576	662	756	852	910	973	1017

## Sheet: Silkie
individual id	sex	blood sample id	BW0	BW1	BW2	BW3	BW4	BW5	BW6	BW7	BW8	BW9	BW10	BW11	BW12	BW13	BW14	BW15
A00201	F	WJ47	26.8	40.7	61	90.6	118.2	166.8	206	247	296	349	397	464	503	561	624	642
A00202	F	WJ96	22.8	43.7	63.2	108	135.3	178.2	235	281	327	374	441	486	528	587	633	654
A00203	F	WJ89	24.8	50.6	79.2	106.6	138.8	208.2	261	317	380	432	498	534	593	663	712	674
A00204	M	WJ12	22.4	53.3	78.6	127.4	169.8	252.4	333	376	470	570	666	768	824	898	985	1000
A00205	F	WJ44	24.4	51.5	76.4	106.8	135.4	175.4	235	281	330	382	426	480	556	624	680	684
A00206	F	WJ21	23.6	45.4	73.6	107	178.4	209.8	246	310	374	428	489	546	620	682	732	746
A00207	M	WJ95	22.4	51.6	89.8	137.4	188.1	277.8	359	430	552	644	746	826	939	1027	1040	1062
A00208	F	WJ48	24.6	47.6	79.8	122.8	151	214	267	308	368	424	486	538	596	647	691	702
A00209	F	WJ32	26	48.6	73.4	122.8	156.1	218.4	272	320	381	447	505	552	623	670	701	716
A00211	F	WJ2	23.2	49.4	73.4	121.4	158.6	228.6	274	336	412	470	541	600	660	728	786	800
A00212	NA	WJ60	NA	NA	NA	NA	NA	NA	NA	NA	NA	NA	NA	NA	NA	NA	NA	NA
A00213	F	WJ4	25.2	58.1	84.2	135	168.3	234.6	286	340	412	495	564	620	681	743	792	798
A00214	F	WJ13	23	41.5	76.2	84.2	103.2	143.8	182	213	266	310	379	422	489	546	614	626
A00215	F	WJ63	26.8	51.4	71.4	112	152.3	211.2	269	296	367	424	493	546	610	672	715	730
A00216	F	WJ87	23.6	46.9	68.4	108.3	136.4	190	239	281	314	394	465	524	579	619	683	676
A00217	F	WJ25	22.6	40.9	59.4	93.4	106.9	135.6	195	228	254	300	357	400	444	490	52	542
A00219	M	WJ74	28.4	55	88	145.8	153.2	237	296	355	421	506	596	670	753	836	915	968
A00220	F	WJ86	24.2	49.9	76.6	120.4	164.6	235	331	410	495	574	668	730	799	870	929	928
A00221	M	WJ6	24.4	51.3	77.2	101.8	141.8	209	268	335	411	498	594	656	747	830	937	928
A00222	M	WJ29	22.4	48.8	81.2	120.6	146	196.2	242	297	355	423	505	572	632	705	773	814
A00223	M	WJ85	22.8	47.6	79.6	124.8	162.5	225.6	303	390	473	541	637	716	787	880	956	1006
A00224	F	WJ9	25.2	49.7	76	125.4	161	234.2	295	347	420	479	557	614	675	732	780	776
A00225	M	WJ99	23.2	55.5	87.6	153.6	197.6	278.4	304	424	521	621	717	798	887	979	1001	1052
A00226	F	WJ75	23	42.4	64.4	96.4	128.4	188.8	231	271	333	393	451	500	534	586	639	616
A00227	F	WJ83	26.4	46.5	64.8	102.6	126.5	180	228	264	318	371	432	478	539	599	658	676
A00228	F	WJ84	20.8	39.3	63.8	94.4	117	181.8	236	284	336	396	451	508	573	635	643	664
A00229	F	WJ8	24.2	48.7	61.4	87.8	95.4	126.8	156	182	189	235	223	318	369	429	479	502
A00230	F	WJ42	25.6	54.3	73.8	103.6	130.5	181.2	237	294	354	406	480	534	599	654	708	730
A00232	M	WJ1	28	60.2	91.4	134.2	185.3	284.8	386	462	569	663	772	838	920	1027	1099	1082
A00233	F	WJ78	23.2	49.7	78.2	109.4	137	191.6	238	281	357	407	761	480	569	635	699	700
A00234	F	WJ64	29.8	54	82.2	323	155.9	242	313	372	451	521	593	662	723	757	813	854
A00235	M	WJ57	24.2	49.3	81.6	126.8	162.7	246	327	400	480	540	606	720	803	891	934	936
A00236	F	WJ93	20.8	45	59.2	88.6	115.4	156.6	199	230	253	302	354	390	434	494	533	538
A00237	M	WJ10	22.8	45.4	87	133.2	171.7	270	334	400	509	608	705	810	915	990	1044	1094
A00238	F	WJ39	24	43.7	70.8	102.8	130	185.6	247	292	345	405	457	514	582	631	705	704
A00239	F	WJ59	24.2	49.4	76.2	120.2	144.7	198.2	261	300	349	408	478	526	583	633	691	700
A00240	M	WJ90	26.4	48.8	76.4	124	152.9	212.2	288	332	407	470	557	628	690	77	851	902
A00241	M	WJ41	26.2	54.1	85.2	129.5	162.4	232.2	294	341	407	478	548	584	637	693	715	754
A00242	M	WJ33	24.6	53.6	85.9	142.2	193.4	288.2	373	458	560	645	750	850	959	962	1079	1042
A00243	M	WJ11	24.8	51.7	79.2	124.8	154	224.6	283	345	415	486	576	626	709	770	828	864
A00244	F	WJ31	19.6	39.3	65	94.2	123.5	175	224	264	328	384	447	498	547	589	645	670
A00246	M	WJ30	22	47.7	60.4	108.4	128	185.4	241	294	355	430	508	594	669	713	758	789
A00247	F	WJ45	24.2	56.04	81	116.6	147.2	219.6	287	333	420	486	549	608	670	721	780	786
A00248	F	WJ69	24.4	38.8	65.4	109.8	136.3	208	276	324	324	414	478	536	566	614	685	690
A00249	M	WJ16	23.6	53.2	72.6	121.6	155.9	224	286	336	410	479	557	622	684	752	811	840
A00250	M	WJ88	25.2	47.1	76.6	123.4	175.4	241.2	303	383	460	551	620	680	777	864	944	984
A00251	M	WJ37	24.6	53	84.6	115.8	135.5	197.4	268	302	411	508	603	674	786	853	957	950
A00252	F	WJ19	26.2	36.7	47.2	72	89.2	131.6	179	213	266	322	398	450	503	534	619	636
A00253	M	WJ34	26.2	56.8	90.2	152.8	197.1	296	378	443	582	665	798	836	921	1032	1116	1136
A00254	M	WJ72	24.2	49.3	80.2	135.4	190	282.6	367	468	555	655	767	844	950	1083	1152	1204
A00255	M	WJ26	23.2	59.2	88.6	149.6	191	29.74	379	445	583	676	785	854	972	1039	1148	1172
A00256	F	WJ67	25.2	56.1	75.8	108.4	147.1	187.4	243	283	323	390	473	520	576	670	720	754
A00257	F	WJ15	22.2	43.3	64.8	93.4	116.8	175	229	275	309	405	412	468	525	576	632	644
A00259	F	WJ65	24.8	47.9	74.6	121.8	143.1	209	264	306	355	422	468	486	554	602	639	660
A00260	M	WJ22	27	56.4	87.6	149.4	184.6	254	357	440	527	628	707	764	838	916	1007	1002
A00261	M	WJ27	23.4	46.4	65	100.2	129.6	176.2	244	304	386	463	540	608	701	767	852	858
A00262	M	WJ56	25.6	51.5	84.8	133.4	167.2	244.4	315	377	480	560	654	740	835	934	980	1004
A00263	F	WJ70	24.6	45.1	75.8	117	153.2	209.8	282	339	415	470	540	606	657	725	765	769
A00264	M	WJ82	29.2	56.4	93.6	151.6	186	279.2	370	446	521	614	708	782	864	937	985	988
A00265	F	WJ7	21	50	81.2	125.6	170	239.4	301	355	396	450	516	584	629	684	716	720
A00266	M	WJ91	26	52	79.6	137.2	173	245	342	398	487	558	656	742	838	941	990	1000
A00267	M	WJ94	25.6	53.9	83.4	140.6	187.4	289.4	379	460	558	671	768	902	988	1117	1154	1208
A00268	M	WJ81	23.4	52.1	81.4	123.4	179.1	251.2	318	375	468	526	638	696	770	846	902	914
A00269	F	WJ54	23.2	52.3	77.8	119	151.8	195.6	249	290	358	430	486	552	616	684	744	762
A00270	F	WJ38	23.8	43.6	76.8	123.4	162.1	241.8	312	356	440	513	606	654	728	792	834	832
A00271	M	WJ77	25	50.5	93.2	142.8	187.8	267.8	340	413	517	587	668	738	812	896	917	924
A00273	M	WJ66	27	50.4	77.2	135.4	174.1	270	257	429	533	615	706	808	929	1007	1082	1094
A00274	M	WJ40	23.2	53.3	86.4	137.4	194.6	280	322	423	537	626	725	796	906	1001	1080	1088
A00275	F	WJ3	26.6	49.1	72	118.8	43.6	219.8	284	329	391	440	523	590	636	688	749	744
A00276	M	WJ53	21.8	49.3	83	133.8	147.6	252	332	398	497	554	644	728	826	915	986	980
A00277	F	WJ100	24.4	50.5	77.4	126.8	161	231.2	292	345	413	472	549	602	674	718	799	748
A00278	M	WJ62	21	43.8	66.2	108.2	153.9	228.4	290	350	433	509	592	658	733	819	869	910
A00279	M	WJ55	25.8	53	82.2	137.2	173.4	249.4	336	406	490	606	719	820	908	1008	1082	1136
A00280	M	WJ61	25	51.4	72	106.4	138.2	197.2	262	317	407	481	580	634	740	847	934	954
A00281	F	WJ17	26.4	56.7	75.8	108.2	129.8	201.2	232	272	320	371	448	506	547	626	683	702
A00282	M	WJ71	23.8	49.9	73	123.4	158.2	248.2	289	369	473	564	655	746	828	928	1020	1056
A00283	F	WJ58	23.4	45.8	77.8	120.2	157.2	208.6	260	327	401	466	536	616	679	769	832	848
A00284	F	WJ23	22.8	36.6	55.2	80.8	106.3	147.6	185	226	271	307	350	384	414	463	485	496
A00285	F	WJ18	26.8	47.6	76.4	108.4	143.6	210.3	277	327	407	454	512	584	630	698	720	738
A00286	F	WJ97	26	57.4	97.4	143.6	185	257.2	309	372	474	554	635	710	786	861	878	906
A00287	M	WJ92	23.2	58.6	78.6	134.8	171	239.2	313	395	471	543	639	726	792	871	947	984
A00288	F	WJ43	24.4	50.3	74.4	112	153.5	205.8	266	310	377	434	503	572	641	717	775	790
A00289	F	WJ20	22.8	53.4	78.2	129.6	167.9	247.2	314	356	426	492	560	628	703	735	781	802
A00290	F	WJ50	23.8	51.3	83.2	124.8	155.5	217.8	264	322	393	454	508	568	627	692	763	772
A00291	M	WJ101	26.4	51.2	76.6	135.6	169.5	268	344	433	531	634	716	808	929	1024	1051	1096
A00292	NA	WJ102	NA	NA	NA	NA	NA	NA	NA	NA	NA	NA	NA	NA	NA	NA	NA	NA
A00293	M	WJ51	27.2	57.7	80	132.4	173	264.2	338	406	518	597	702	762	863	922	1014	1048
A00294	F	WJ52	24.2	48.2	72.6	106.8	126.2	184	231	280	333	380	441	498	559	604	640	656
A00296	M	WJ80	23	44.2	76.6	117	162.5	252.6	324	404	505	579	685	772	870	943	1090	1106
A00298	F	WJ98	17.2	38.8	63	107.6	141.1	201.2	256	302	370	433	492	532	600	651	706	716
A00299	M	WJ73	23.6	53.02	85	136.8	163.7	232.2	291	342	439	516	596	672	738	808	881	912
A00300	M	WJ5	26.6	42.2	73.8	126	156.4	233.2	285	334	399	430	533	594	668	730	780	866
A00301	F	WJ35	26.8	50	71.4	109.8	137.6	213	276	317	389	451	527	596	639	707	780	782
A00303	M	WJ46	24.6	55.1	100.2	151.2	214.7	299.8	377	464	551	639	724	832	927	1011	1070	1076
A00304	F	WJ14	26.2	54.3	85	131.8	181.6	269	353	425	474	567	651	730	779	845	881	904
A00305	M	WJ49	26	55	80.4	116.8	155.7	228.2	304	375	445	540	653	718	824	909	1025	1046
A00306	F	WJ36	20.4	44.1	65.4	92.6	118.9	181.2	230	272	354	410	474	522	569	619	677	674
A00307	F	WJ28	21.6	42.8	69.6	107.8	132.2	190.6	246	290	351	426	500	568	627	684	751	744
A00308	F	WJ24	26.8	46.6	70.4	104	125	184.8	261	310	369	426	496	566	638	701	760	768
A00317	F	WJ79	22.8	52.1	78.4	119	151.4	219.2	283	334	395	463	539	584	649	680	752	772
A00320	M	WJ76	24.2	53.3	89	131.1	172.8	260.2	303	432	520	616	719	800	929	942	1026	1052
A00321	F	WJ68	21.6	43.4	69.8	106	137.7	202	267	318	371	430	497	548	600	632	737	738

## Sheet: Langshan
individual id	sex	blood sample id	BW0	BW1	BW2	BW3	BW4	BW5	BW6	BW7	BW8	BW9	BW10	BW11	BW12	BW13	BW14	BW15
B00003	F	LS55	37.2	74.6	133.4	202	295.2	397	476	596	706	829	973	1130	1294	1365	1525	1810
B00004	F	LS62	37.6	60.8	113.8	178	268	340	394	442	550	682	816	880	974	1031	1152	1294
B00005	F	LS91	37.2	68.2	125.8	194	292	329	410	491	655	739	875	985	1114	1155	1240	1460
B00006	M	LS13	33.8	66.2	122	192	298	421	534	689	831	987	1209	1335	1550	1583	1663	1977
B00007	F	LS82	37.2	66.6	115.4	206	295.8	380	480	547	609	786	941	1045	1199	1243	1394	1546
B00008	F	LS90	39	65.2	119	186	240	310	410	532	642	804	908	1006	1121	1200	1296	1410
B00011	M	LS10	36	67.2	139.2	230	341	447	534	660	818	1019	1205	1350	1560	1659	1882	2150
B00012	M	LS99	32.6	61.6	114.2	188	291	390	490	614	766	889	1030	1145	1250	1286	1361	1486
B00014	F	LS80	32.4	63	124.4	194	301	388	402	482	564	752	846	960	1134	1220	1360	1616
B00015	F	LS63	38.4	66	130.6	208	302	381	458	570	684	844	954	1035	1132	1200	1276	1435
B00016	M	LS20	35.2	65.6	134.8	228	354	472	578	680	853	1047	1280	1410	1586	1728	1868	2062
B00017	F	LS94	35.2	59.6	111.2	162	231	305	324	360	462	582	706	795	910	984	1083	1281
B00019	F	LS66	34.2	72.6	129.8	200	278	350	404	481	580	706	791	865	901	957	1013	1120
B00020	M	LS29	32.4	67.6	128	210	342	453	564	717	855	1039	1237	1400	1555	1529	1711	1890
B00021	M	LS23	36.8	57.2	111.2	190	283.4	403	454	562	709	876	1056	1160	1407	1510	1639	1701
B00022	M	LS32	37.6	71.2	121.8	210	316.4	453	500	620	754	927	1072	1190	1300	1394	1509	1746
B00024	M	LS6	37	68.8	119.6	190	250	347	402	442	690	692	835	975	1123	1177	1286	1507
B00025	M	LS21	37	73.8	143.6	250	356	470	592	722	854	1032	1261	1410	1496	1592	1779	1953
B00027	F	LS68	39	65.2	133.4	216	321.6	399	484	575	680	762	861	955	1060	1129	1220	1378
B00028	F	LS83	32.4	69	128.6	204	300.8	370	460	597	719	852	959	1045	1176	1263	1389	1505
B00029	F	LS53	35.4	59.2	113.8	176	226.2	317	416	543	691	845	980	1100	1228	1310	1402	1600
B00030	M	LS25	38.2	64.4	135.2	216	341	468	566	551	618	787	949	1095	1226	1281	1355	1707
B00033	M	LS34	34.8	63.8	125.8	208	321	412	506	623	709	834	854	995	1175	1310	1535	1803
B00037	F	LS60	34.4	71	134.8	222	325.6	420	512	588	742	937	1088	1210	1392	1465	1626	1852
B00038	M	LS28	39.2	64.6	132.4	210	335	463	566	697	749	958	1153	1330	1432	1500	1570	1890
B00039	M	LS27	37.6	64.4	118.2	190	305	395	462	515	639	815	1002	1150	1299	1274	1480	1820
B00042	F	LS48	32.8	67.4	118.2	188	281.6	354	434	553	673	802	912	1010	1074	1145	1234	1270
B00044	F	LS79	38.2	67.8	135.6	200	294.2	386	430	538	623	744	875	996	1063	1110	1216	1420
B00045	F	LS93	34.2	62.8	125.8	202	285	405	516	646	733	891	1016	1135	1275	1319	1410	1520
B00046	F	LS84	34.6	62.8	115.4	174	264	353	388	467	534	667	814	948	1103	1208	1338	1525
B00048	M	LS17	34.4	70.6	132.6	216	332.8	434	514	696	830	984	1204	1370	1584	1668	1830	1834
B00050	F	LS58	32	55	109.6	182	274	333	440	570	700	860	991	1120	1314	1402	1528	1460
B00051	F	LS81	37.4	62.2	120.8	208	309	369	474	524	633	784	923	1005	1129	1168	1338	1528
B00053	M	LS44	33.6	60.8	119.2	182	281.4	398	458	501	608	766	924	1050	1097	1126	1299	1545
B00054	F	LS67	38.4	69.2	134.6	210	328.4	425	486	584	600	794	925	1060	1127	1205	1345	1429
B00056	M	LS45	35.6	61	112	198	296	391	490	566	653	842	953	980	1103	1168	1294	1550
B00059	M	LS30	36.2	61.6	125.6	194	293	411	472	565	688	868	1003	1105	1292	1386	1568	1939
B00061	M	LS2	32.2	59	110	178	289.2	405	476	568	607	789	972	1130	1274	1376	1506	1791
B00064	F	LS76	33.4	66.6	128.6	204	317	405	508	610	740	838	983	1105	1221	1310	1419	1670
B00065	F	LS69	37.6	75.8	145.8	226	331	426	492	539	671	863	952	1045	1132	1237	1400	1548
B00066	F	LS87	38.8	82.2	143.6	210	290.8	392	518	523	666	833	952	1055	1148	1242	1323	1520
B00067	F	LS59	33.6	62.6	117.4	196	284	352	452	591	741	928	1047	1180	1330	1417	1530	1730
B00070	M	LS46	33	67.2	122.6	186	293.6	376	516	668	803	959	1093	1260	1350	1470	1663	1875
B00073	M	LS40	35.4	68.4	128.2	214	317	412	506	582	713	874	1070	1175	1306	1418	1595	1921
B00074	M	LS14	31.8	73.6	135.4	240	355	462	550	674	848	1028	1222	1375	1510	1615	1797	2060
B00075	F	LS75	38.2	73.6	143.6	224	321.8	444	556	670	759	887	1040	1172	1306	1371	1457	1681
B00076	F	LS77	34.4	63.8	108.4	162	226	289	350	414	496	530	652	660	772	865	946	1149
B00077	F	LS71	37.4	74.4	146.8	208	294	380	458	561	636	812	949	1055	1179	1287	1394	1580
B00078	F	LS61	40.6	67	129.6	202	301	395	464	581	632	823	928	1060	1220	1277	1366	1575
B00080	F	LS78	37.8	64.2	109.6	168	238	303	362	469	539	673	795	906	985	1043	1154	1339
B00082	M	LS47	37.4	74	133.2	202	295.8	391	374	544	652	644	856	1010	1143	1267	1300	1596
B00083	F	LS57	36.4	67.4	128.4	206	305.8	398	518	654	769	938	1066	1170	129	1356	1448	1680
B00085	M	LS24	31.2	52.8	98.4	184	262.4	402	592	659	853	1050	1201	1390	1621	1747	1853	2130
B00087	F	LS89	37	67	128.8	210	298.4	351	472	565	622	776	919	925	834	840	856	872
B00090	F	LS74	39.2	67.8	116.8	194	278.6	379	460	588	697	829	926	1030	1130	1215	1312	1470
B00091	M	LS43	31	68.8	130.4	216	340	431	524	569	824	1012	1210	1440	1650	1760	1860	1969
B00092	M	LS33	37.6	73	119.6	182	291.4	396	502	629	768	1002	1211	1350	1624	1776	1997	2259
B00094	M	LS98	34.8	70.4	137.2	240	354	485	570	713	850	1038	1192	1330	1336	1506	1664	1965
B00096	M	LS38	38.2	69	131.4	202	300	398	508	591	731	859	1012	1110	1104	1125	1113	1170
B00097	M	LS15	36	70.4	126.6	212	315.45	436	564	730	901	1098	1253	1385	1590	1665	1870	2088
B00098	F	LS92	34.8	52.6	87.4	142	204.4	271	312	315	313	449	562	630	704	803	851	1001
B00099	F	LS73	35.2	65.4	130.4	212	309	354	472	588	687	791	925	1030	1162	1240	1370	1570
B00100	F	LS52	37	75	149.8	190	282	352	438	530	675	821	940	1060	1187	1278	1364	1503
B00101	M	LS5	35.4	64.2	121.2	182	275.4	401	516	620	690	795	935	1044	1200	1300	1395	1650
B00103	F	LS51	33.2	62.2	96.6	144	197	258	314	380	483	546	660	742	860	880	994	1130
B00105	F	LS65	37.2	70.8	127	208	290.6	357	408	516	646	736	881	990	1096	1130	1270	1430
B00106	M	LS11	35.8	57	93	140	199.8	277	344	374	317	407	520	655	781	855	972	1144
B00107	M	LS39	30	57.6	97.6	174	259	312	444	514	706	905	1119	1280	1534	947	1760	2057
B00108	M	LS4	40.6	74.4	141.8	236	338	325	610	749	870	1015	1119	1270	1406	1510	1633	1776
B00109	M	LS1	35.8	70.2	128	200	285	391	496	540	680	857	1005	1150	1305	1449	1630	1774
B00111	M	LS42	34.4	62.2	121.6	206	322.6	416	472	590	752	930	1157	1350	1555	1678	1845	2039
B00112	M	LS37	35.6	55.6	103.8	158	246.8	344	444	536	638	759	869	975	1115	1194	1321	1495
B00113	M	LS41	33.6	73.4	148.2	234	343.8	447	552	711	86	1046	1200	1375	1545	1613	1840	1960
B00114	M	LS18	35	66.8	120.8	200	307	419	514	624	768	983	1178	1310	1497	1589	1697	1810
B00116	M	LS8	35	75	152.6	234	360	462	576	760	893	1082	1250	1425	1592	1692	1850	2117
B00117	M	LS16	35.8	59.4	115	206	295	386	474	599	765	898	1081	1255	1465	1568	1777	2035
B00118	F	LS50	35.8	68	134.8	228	331.2	428	524	640	776	895	961	1105	1221	1294	1420	1610
B00119	M	LS9	36.2	64.8	120.8	192	274	400	500	583	750	976	1121	1345	1580	1636	1860	2078
B00128	F	LS88	31.8	64.6	122.6	192	270.4	346	406	514	618	767	856	955	1053	1162	1285	1476
B00129	M	LS3	39.8	71.4	133.4	206	323.4	409	506	613	750	938	1116	1225	1324	1370	1519	1903
B00130	M	LS36	35.8	63.4	110.6	184	275.4	385	466	554	694	879	1011	1146	1303	1410	1570	1840
B00131	M	LS22	35	59.2	120	206	304	405	450	619	584	758	931	1045	1210	1342	1492	1830
B00132	M	LS19	34.8	64.2	127	202	312	407	496	528	650	820	1018	1260	1358	1465	1603	1902
B00133	M	LS100	40.6	73.8	145.2	232	331	416	554	726	901	1082	1134	1305	1489	1667	1796	1870
B00136	F	LS64	33.8	65.2	111	180	263.4	341	388	482	586	695	819	910	1015	1072	1137	1306
B00140	F	LS72	35.8	70.6	143.2	216	319	392	460	586	729	873	1038	1166	1349	1430	1598	1925
B00141	F	LS54	32.6	57.4	108.6	170	259	324	326	372	461	576	684	808	884	910	1029	1120
B00142	F	LS49	34.6	63.6	120.8	202	295	382	464	559	670	758	879	950	1085	1161	1252	1390
B00143	M	LS31	37.2	66	131.2	210	348	472	564	729	740	932	1164	1360	1510	1564	1748	1930
B00146	M	LS35	33.8	73.4	139.8	218	332	431	546	685	803	1023	1210	1350	1550	1665	1819	2166
B00147	F	LS70	34	71.2	130.4	200	299.4	386	452	520	648	784	921	1025	1148	1225	1318	1490
B00148	F	LS86	35.4	62.4	121.8	200	319.2	424	454	511	570	729	892	1065	1247	1375	1529	1704
B00151	F	LS85	35	68	118	170	236	298	320	407	486	571	576	760	870	911	1057	1228
B00153	M	LS7	36.6	70.6	124.8	206	285	359	370	453	571	488	596	780	981	840	993	1193
B00156	M	LS12	33.2	66.4	124.2	206	310.6	430	570	700	867	1061	1244	1420	1604	1761	1912	2065
B00158	F	LS95	38.2	69.2	122	182	289	330	458	522	664	813	916	1005	1158	1216	1341	1479
B00159	F	LS96	35.4	61.8	123	184	264	350	442	557	66	793	920	1030	1154	1235	1324	1533
B00161	F	LS97	28.4	61	122.6	190	286	339	448	546	647	754	898	1020	1087	1131	1250	1386
B00162	M	LS26	37	71.8	137.6	228	331	437	558	713	825	998	1129	1270	1425	1558	1680	1883
B00163	F	LS56	38.8	73.4	141.4	222	283	385	448	503	582	716	843	945	1039	1091	1232	1420

## Sheet: Beard
individual id	sex	blood sample id	BW0	BW1	BW2	BW3	BW4	BW5	BW6	BW7	BW8	BW9	BW10	BW11	BW12	BW13	BW14	BW15
C00001	F	HX92	35.4	70	132.6	215	318	396	506	592	697	879	1012	1098	1227	1321	1459	1638
C00002	M	HX36	41.4	84.4	160	256.8	298	539	686	874	1019	1196	1298	1417	1548	1602	1705	1790
C00003	F	HX70	37.6	69.6	139.6	237.6	326	448	587	722	832	1003	1102	1222	1393	1707	1613	1884
C00004	M	HX34	31.6	65.6	132	226.8	346	455	596	900	843	1009	1106	1211	1323	1362	1413	1593
C00005	F	HX57	41	71.4	125.2	181.4	246	338	445	570	698	867	990	1095	1120	1188	1351	1548
C00006	F	HX96	32.4	59.2	120.6	199.6	312	442	554	672	806	945	1054	1135	1285	1450	1412	1632
C00007	M	HX6	32.6	67.2	124	185.6	284	390	504	634	753	908	1055	1148	1255	1285	1355	1468
C00008	M	HX48	39.2	59.8	121.2	199.4	320	424	554	726	858	1008	1133	1249	1612	1464	1498	1708
C00009	M	HX19	42.4	80.4	152.8	264.8	404	550	640	830	977	1129	1296	1385	1536	1574	1642	1770
C00010	M	HX4	35.2	53.8	119.4	142.4	238	367	371	462	631	783	806	1031	1244	1310	1454	1646
C00011	F	HX68	32.8	70.4	141.8	245.6	380	505	639	756	880	1026	1146	1245	1389	1466	1613	1776
C00012	F	HX74	37.2	70.8	140.8	235.4	352	442	526	644	748	801	706	844	864	815	774	857
C00013	M	HX30	35.4	62.4	112.8	157	262	365	436	564	679	802	926	1029	1172	1258	1385	1523
C00014	F	HX75	36.4	50	91.8	148.2	224	303	390	494	612	738	846	932	1070	1126	1228	1412
C00015	M	HX3	35.2	67.4	126	181	284	388	500	650	766	939	1083	1167	1316	1390	1401	1605
C00016	F	HX86	37.6	72	136.6	216.6	324	418	547	69	811	990	1083	1227	1400	1487	1591	1752
C00017	M	HX16	33.4	64	136	214	320	415	534	674	784	899	962	1075	1212	1291	1408	1548
C00018	M	HX37	45.4	92.4	188.6	316.8	486	586	726	938	899	977	1068	1202	1377	1534	1751	2012
C00019	F	HX71	37.4	69.8	121.4	184	280	362	456	576	686	800	920	997	1085	1148	1117	1364
C00021	F	HX53	36.4	67.4	126.2	207	304	370	459	596	721	861	985	1109	1264	1375	1463	1625
C00022	F	HX98	35.4	69.4	117.8	180	286	380	473	570	669	797	887	947	1061	1150	1249	1348
C00023	M	HX5	39	69.4	126.2	198.8	310	390	505	632	762	918	1056	1096	1224	1292	1384	1520
C00027	M	HX28	39	85.4	162	278.2	374	583	727	922	1058	1272	1280	1518	1719	1810	1902	1901
C00028	M	HX10	46	67.8	142.6	248.4	406	558	725	936	1146	1382	1580	1728	1880	1946	2074	2066
C00029	M	HX18	40.8	72	142.8	204.4	322	434	548	656	814	1007	1165	1347	1253	1464	1605	1780
C00030	M	HX33	34.8	73	138.6	259.6	404	544	741	922	1119	1348	1551	1718	1907	1995	2102	2194
C00031	F	HX85	41.8	66.4	97.4	172.6	262	341	427	566	652	800	914	1046	1180	1232	1362	1487
C00032	M	HX17	35.2	68.2	148.6	250.2	420	526	693	894	1116	1216	1553	1707	1844	1899	1970	2008
C00033	F	HX82	39.8	64.6	110.2	175.6	256	387	422	526	566	1716	840	958	1092	1189	1261	1427
C00034	F	HX66	29.4	59.2	104	178	246	306	332	418	463	557	650	718	798	853	977	1126
C00035	M	HX44	35.2	54.4	115.4	204.4	316	462	596	768	942	1109	1225	1330	1456	1516	1626	1760
C00036	M	HX15	NA	NA	NA	NA	NA	NA	NA	NA	NA	NA	NA	NA	NA	NA	NA	NA
C00037	M	HX2	35.6	73.4	149.8	227	346	494	621	794	937	1142	1337	1434	1594	1755	1849	2076
C00038	F	HX67	37.8	63.2	115.8	183.4	274	360	465	608	712	873	1020	1098	1266	1286	1397	1628
C00039	M	HX49	30.6	58.4	111.4	194.6	278	400	489	682	731	903	1059	1201	1415	1470	1551	1790
C00040	F	HX62	37.4	62.8	125.6	207.8	282	371	497	628	716	873	1020	1021	1100	1170	1296	1474
C00042	F	HX94	43.4	74.6	137.4	244.2	380	490	634	816	955	1092	1266	1346	1570	1659	1810	2005
C00043	F	HX89	42	75	149.6	237	356	458	603	754	868	1022	1192	1300	1477	1567	1680	1898
C00044	M	HX27	31.6	55	112	176.2	258	361	448	584	728	911	1013	1172	1342	1451	1556	1797
C00045	M	HX39	34.8	61.8	123.2	213.4	350	478	566	718	867	1066	1277	1410	1597	1658	1758	1880
C00046	F	HX80	35.6	65.4	118.2	189	280	361	449	564	648	787	897	993	1119	1198	1294	1444
C00047	M	HX13	36.8	67.4	125.2	208.8	280	396	510	568	710	887	1014	1147	1289	1375	1498	1592
C00048	M	HX35	39.8	67.4	132	223.2	330	473	575	756	912	1113	1275	1374	1463	1544	1690	1837
C00049	F	HX84	32.6	63.6	116.2	192.6	262	366	421	554	664	798	908	952	1131	1237	1405	1578
C00051	F	HX91	35.4	66.4	127.8	215.6	346	450	557	712	843	983	1125	1225	1380	1574	1690	1870
C00052	M	HX40	33.4	63.8	123.2	201.2	310	416	583	750	889	1091	1291	1471	1666	1692	1811	1983
C00053	F	HX72	35.8	58.8	122.6	194.4	280	388	467	610	731	887	1031	1179	1310	136	1455	1635
C00054	F	HX90	34.2	62	104.6	172.4	246	322	389	444	541	643	726	776	918	1001	1089	1222
C00055	M	HX45	41.2	68.8	132	210.2	342	474	606	770	879	1020	1085	1230	1323	1415	1531	1704
C00056	F	HX51	38.4	70.6	124.2	184.2	270	345	448	540	628	745	859	928	1048	1142	1255	1262
C00057	F	HX58	30.4	56.8	112.4	178.8	264	350	445	556	645	747	812	955	1088	1112	1210	1407
C00058	F	HX83	37.6	71.6	142	236.4	316	393	501	630	738	859	981	1080	1220	1285	1395	1505
C00060	F	HX97	32.2	53.6	92	150.8	228	302	385	494	564	720	830	945	1078	1140	1233	1437
C00061	M	HX43	33.4	68.8	149.2	249.6	400	537	726	928	712	1409	1580	1657	1872	1913	2067	2192
C00062	F	HX87	32.8	70.6	144.8	234.8	346	451	577	728	941	990	1224	1136	1261	1365	1455	1826
C00063	M	HX20	34	69.2	146	261.8	390	478	713	932	1103	1241	1408	1518	1814	1871	1914	2040
C00064	F	HX78	33.6	64.6	118.8	174.6	270	356	455	478	621	708	916	908	1075	1134	1280	1499
C00065	F	HX61	37.4	71.4	126.6	206.8	302	354	457	554	599	737	792	895	1016	1024	1121	1180
C00066	M	HX22	34.6	66.2	116	190.4	280	380	406	532	672	830	902	965	1060	1089	1150	1256
C00067	F	HX63	31.2	67.8	130	226.4	334	430	535	638	769	812	979	1075	1241	1296	1342	1516
C00068	F	HX73	33.4	77.2	147.6	228.2	324	426	549	688	814	957	1095	1220	1471	1553	1687	1678
C00069	M	HX41	31.2	62.2	108.4	183.4	290	395	520	682	800	970	1108	1169	1273	1324	1460	1892
C00070	M	HX42	34.4	70.8	124.8	205	300	429	528	722	809	946	1086	1243	1412	1482	1668	1806
C00071	F	HX55	33.8	59.6	115.2	191.8	280	362	463	576	677	942	913	1000	1109	1169	1272	1403
C00072	F	HX93	32.4	50.2	100.4	169.2	264	363	467	578	690	796	879	965	1065	1160	1238	1356
C00074	F	HX88	32.4	67.6	127.2	218.4	336	458	554	670	802	975	1114	1201	1291	1393	1531	1787
C00077	F	HX76	40.6	75.4	138.4	235.4	338	462	582	726	862	1030	1078	1266	1489	1587	1724	1972
C00078	M	HX38	39	69	125.6	194.2	280	415	540	662	805	965	1108	1218	1383	1443	1554	1764
C00079	F	HX56	39.8	60.6	116	190.4	276	381	465	618	964	807	866	979	1170	1253	1368	1533
C00081	F	HX60	32.6	58.8	107.6	178.4	264	339	425	53.8	641	764	864	979	1102	1154	1272	1397
C00082	F	HX59	35.6	75.2	138.4	226	340	436	540	704	829	990	1096	1270	1399	1479	1576	1695
C00083	F	HX95	39.8	78.8	147.6	238.6	352	474	610	704	871	1068	1251	1329	1424	1560	1730	1914
C00084	M	HX1	33.8	60	126	214.8	334	466	596	766	894	1366	1244	1361	1539	1542	1677	1841
C00085	M	HX21	37	58.6	110.4	182.6	282	380	508	630	752	919	1069	1180	1306	1420	1571	1702
C00086	M	HX14	32.8	73.8	144.6	237.2	380	507	572	708	863	1027	1144	1231	1375	1420	1530	1606
C00087	M	HX11	32.4	58.8	112.4	194.2	302	446	586	750	898	1117	1243	1365	1522	1598	1712	1770
C00088	M	HX12	33.6	64.6	117.4	183.4	266	361	454	550	642	783	845	996	1176	1269	1369	1475
C00089	M	HX25	39.6	63.6	133.8	221.4	340	460	539	658	788	931	1020	1054	1185	1263	1370	1530
C00090	M	HX46	40.8	72.8	144.2	230	368	475	612	762	888	1057	888	1236	1404	1466	1567	1657
C00091	M	HX8	35.6	75.2	148.8	253.4	374	524	684	964	1021	1237	1415	1592	1774	1836	1936	2119
C00093	M	HX23	35.2	69.4	138.2	222.8	360	499	641	836	996	1209	1980	1464	1612	1694	1772	1808
C00095	M	HX7	31	70.8	126	194.8	310	428	526	640	799	1013	1172	1345	1555	1663	1850	2027
C00096	F	HX52	35.6	69	136	234.4	336	420	560	724	849	1003	1138	1286	1370	1566	1726	1972
C00097	F	HX64	34.4	62.2	119.2	207.4	292	545	527	672	774	896	1036	1168	1305	1420	1545	1639
C00100	F	HX65	36.8	55.8	109.6	190.6	298	405	526	676	805	968	1106	1231	1445	1506	1665	1868
C00101	M	HX9	36	71.8	139.8	233	350	482	650	836	959	1104	1302	1415	1579	1632	1755	1894
C00102	M	HX29	32.6	54.8	111.4	178.2	282	391	517	682	840	1010	1187	1348	1508	1621	1710	1839
C00105	M	HX31	37.2	63	134.2	194.4	332	438	584	774	934	1159	1356	1469	1690	1747	1891	2022
C00106	F	HX54	34.6	60.2	120.8	200.6	308	420	507	650	786	951	1026	1109	1546	1333	1354	1611
C00107	F	HX69	32	61.6	112.4	183.8	282	382	480	584	699	842	969	1076	1212	1284	1335	1360
C00108	M	HX99	39	65.8	141	236.4	388	553	724	868	1072	1292	1448	1554	1760	1830	1930	2054
C00109	M	HX26	38.8	65.4	124.4	220.8	342	497	609	818	998	1226	1428	1586	1775	1831	1987	2118
C00111	F	HX81	34	64.8	121.2	193	280	33	450	534	631	771	884	947	1075	1127	1189	1404
C00112	M	HX47	36.8	65.2	121.8	207.4	288	391	489	622	770	950	1085	1153	1287	1331	1419	1582
C00113	M	HX32	34	71.6	136	248.6	368	508	647	824	960	1103	1286	1443	1623	1693	1787	1903
C00114	F	HX77	30.4	76.6	125.2	195.2	290	369	404	482	595	754	836	977	1105	1158	1310	1489
C00115	F	HX79	44	76	130.6	217.4	318	429	495	560	683	862	945	1031	1463	1219	1345	1474
C00116	F	HX50	30.6	70.8	127.6	203.8	316	415	521	630	739	903	1029	1107	1258	1314	1436	1594
C00117	M	HX24	30.6	59.2	116.8	205.8	312	435	565	726	882	1069	1214	1376	1583	1665	1733	1898
C00200	F	HX100	33.6	84.6	149.2	255.2	366	536	662	838	1018	1216	1342	1580	1835	1941	2172	2440
