# Supplementary material for: Polygenic Basis and Variable Genetic Architectures Contribute to the Complex Nature of Body Weight —A Genome-Wide Study in Four Chinese Indigenous Chicken Breeds
Source: Front Genet. 2018 Jul 2;9:229. doi: 10.3389/fgene.2018.00229 (PMC6036123; doi:10.3389/fgene.2018.00229)
Supplement: TABLE S1 — Data structure of the four subpopulations. [file Table_1.XLSX]

## Sheet: Sheet1
Table S1 Data structure of the four subpopulations
Breed	Before QC		After QC
	N cock1	N hen2	N cock1	N hen2
Chahua	50	52	49	48
Silkie	45	55	45	55
Langshan	50	50	49	47
Beard	50	50	48	47
1 2 Ncock means the number of cocks while Nhen indicates the number of hens
