# Supplementary material for: Polygenic Basis and Variable Genetic Architectures Contribute to the Complex Nature of Body Weight —A Genome-Wide Study in Four Chinese Indigenous Chicken Breeds
Source: Front Genet. 2018 Jul 2;9:229. doi: 10.3389/fgene.2018.00229 (PMC6036123; doi:10.3389/fgene.2018.00229)
Supplement: TABLE S2 — Summary statistics of SNP markers acorss whole-genome in this dataset. [file Table_2.XLSX]

## Sheet: Table S4
Table S2 Summary statistics of SNP markers acorss whole-genome in this dataset
Chromosome 1	Physical Map (Mb) 2	No. of SNP Markers	Average Distance (Kb)
GGA1	200.98	7361	27.3
GGA2	154.86	5642	27.45
GGA3	113.58	4227	26.87
GGA4	94.23	3437	27.42
GGA5	62.24	2218	28.06
GGA6	37.35	1782	20.96
GGA7	38.24	1864	20.52
GGA8	30.63	1421	21.56
GGA9	25.55	1235	20.69
GGA10	22.47	1337	16.81
GGA11	21.9	1305	16.78
GGA12	20.53	1407	14.59
GGA13	18.9	1206	15.67
GGA14	15.8	1044	15.13
GGA15	12.96	1076	12.04
GGA16	0.42	21	20.21
GGA17	11.18	880	12.7
GGA18	10.89	900	12.1
GGA19	9.92	833	11.91
GGA20	13.94	1531	9.11
GGA21	6.94	807	8.6
GGA22	3.93	290	13.57
GGA23	6.04	607	9.95
GGA24	6.4	735	8.71
GGA25	2.02	180	11.2
GGA26	5.06	651	7.78
GGA27	4.84	470	10.3
GGA28	4.5	580	7.75
LGE22C19W28_E50C23	0.89	119	7.49
LGE64	0.04	4	9.85
Z	74.57	1041	71.64
Total	1031.8	46211	22.33
1 LGE22C19W28_E50C23 and LGE64 are the linkage groups.
2 Physical lengths of the chromosomse are based on the positions of the last markers in this dataset.
