# Supplementary material for: Polygenic Basis and Variable Genetic Architectures Contribute to the Complex Nature of Body Weight —A Genome-Wide Study in Four Chinese Indigenous Chicken Breeds
Source: Front Genet. 2018 Jul 2;9:229. doi: 10.3389/fgene.2018.00229 (PMC6036123; doi:10.3389/fgene.2018.00229)
Supplement: TABLE S3 — Distribution of main haplotypes within each QTL across six sub-populations. [file Table_3.XLSX]

## Sheet: Table S3
Table S3 Distribution of main haplotypes within each QTL across six sub-populations
QTL	Core SNP		Allele (freqency)		Haplotype 1	Frequencies in each sub-population
						RJ 2	Chahua	Silkie	Langshan	Beard	RW 3
BW_Q2	rs15896134		A (0.93)		CGAA	√	0.541237	0.55	0	0.163158	0.0677083
					AGAA	√	0.180412	0.26	0	0.0421053	0.015625
					AAAA	/	0.139175	0.135	0	0.0105263	0.390625
					CGGA	√	0	0	0.630208	0.226316	0
					AAGA	/	0	0	0.296875	0.247368	0.192708
			G (0.07)		CGAG	/	0	0	0	0.289474	0.00520833
BW_Q3	rs14332618		A (0.81)		AAA	√	0.773196	0.64	0.411458	0.378947	0.4375
					AGA	/	0.226804	0.105	0	0.0789474	0.00520833
					GAA	√	0	0.255	0.588542	0.0947368	0.239583
			G (0.19)		AGG	/	0	0	0	0.426316	0.270833
BW_Q5	rs14545931		A (0.81)		AAA	√	0.659794	0	0.234375	0.0315789	0
					GAA	√	0.298969	0.975	0.333333	0.484211	0.291667
			C (0.19)		GCC	/	0	0	0.411458	0	0
					GAC	/	0	0	0	0.242105	0.223958
BW_Q9	rs313615987	rs14678295	A (0.85)	A (0.73)	AGGA	√	0.927835	0.63	0.5625	0.515789	0.119792
				C (0.27)	AGAC	√	0.0103093	0.295	0.0885417	0.278947	0.15625
			G (0.15)		GAGC	/	0	0	0.1979	0	0.1719
BW_Q20	rs315743526		A (0.87)		AA	√	0.871134	0.95	0.598958	0.484211	0.46875
					AG	/	0.0824742	0.005	0.348958	0.136842	0.5
			G (0.13)		GG	/	0.0463918	0	0.0520833	0.378947	0.03125
BW_Q27	rs16719177	rs16040772	A (0.87)	A	AGA	/	0.840206	0.72	0.0572917	0.526316	0.375
					AAA	/	0.0979381	0.07	0.177083	0.178947	0.140625
				G (0.2)	AGG	/	0.0412371	0	0.229167	0.289474	0.442708
					AAG	/	0.0206186	0.21	0	0.00526316	0.0416667
			G (0.13)	A	GGA	/	0	0	0.5365	0	0
1 lists the main haplotype whose frequencies are more than 5% in all samples, and the haplotypes with underlines were the significant haplotypes associated with body weight.
2 denotes red jungle fowl samples; as sample size is only four, estimates of frequencies are biased so that they are not presented.
3 denotes recessive white samples.
